1       **Comparison of trimethoprim-sulfamethoxazole versus ciprofloxacin monotherapy in**  
2                    ***Stenotrophomonas maltophilia* bloodstream infections in children**

3   Ahu Aksay, M.D (corresponding author)

4   Department of Pediatric Infectious Diseases, Cumhuriyet University Faculty of Medicine,  
5   Sivas, Turkey

6   e-mail: [ahukara01@hotmail.com](mailto:ahukara01@hotmail.com)

7   tel: +90 5062921917

8

9   İlker Devrim, M.D.

10   Department of Pediatric Infectious Diseases, Dr. Behçet Uz Children's Hospital, Izmir,  
11   Turkey

12

13   Nagehan Katipoğlu, M.D.

14   Dr. Behçet Uz Childrens Hospital, Dr. Behçet Uz Children's Hospital, Izmir, Turkey

15

16   Nuri Bayram, M.D.

17   Department of Pediatric Infectious Diseases, Dr. Behçet Uz Children's Hospital, Izmir,  
18   Turkey

19

20   Sertaç Arslanoglu, M.D.

21   Department of Neonatal Intensive Care, Dr. Behçet Uz Children's Hospital, Izmir, Turkey

22

23   Şebnem Çallkavur, M.D.

24   Department of Neonatal Intensive Care, Dr. Behçet Uz Children's Hospital, Izmir, Turkey

25

26   Gamze Gülfidan, M.D.

27   Department of Medical Microbiology, Dr. Behçet Uz Children's Hospital, Izmir, Turkey

28

29   Gökhan Ceylan, M.D.

30   Department of Pediatric Intensive Care, Dr. Behçet Uz Children's Hospital, İzmir, Turkey

31

32   Hasan Ağin, M.D.

33   Department of Pediatric Intensive Care, Dr. Behçet Uz Children's Hospital, İzmir, Turkey

34 **Comparison of trimethoprim-sulfamethoxazole versus ciprofloxacin monotherapy in**  
35 ***Stenotrophomonas maltophilia* bloodstream infections in children**  
36

37 **ABSTRACT**

38 Treatment of invasive infections caused by *Stenotrophomonas maltophilia* is difficult as the  
39 bacterium is frequently resistant to a wide range of commonly used antimicrobials. The aim of  
40 this retrospective study was to evaluate effectiveness of treatment with ciprofloxacin  
41 monotherapy compared to trimethoprim-sulfamethoxazole monotherapy in patients with *S.*  
42 *maltophilia* infections. We evaluated 50 patients with *S. maltophilia* bloodstream infections  
43 who had received monotherapy with trimethoprim-sulfamethoxazole or ciprofloxacin.  
44 Twenty-five patients (50%) received trimethoprim-sulfamethoxazole, and 25 patients (50%)  
45 received ciprofloxacin. Thirty-six (72%) patients were in the intensive care unit. All of the  
46 patients had at least one indwelling devices and approximately 25% patients had  
47 immunosuppression. Ciprofloxacin had the same clinical outcome and mortality as  
48 trimethoprim-sulfamethoxazole for the treatment of *S. maltophilia* bacteremia. In our study;  
49 side-effects ratio were not statistically different between ciprofloxacin and trimethoprim-  
50 sulfamethoxazole group. Ciprofloxacin could be an alternative drug of choice for treating *S.*  
51 *maltophilia* infections especially in premature infants in stead of trimethoprim-  
52 sulfamethoxazole.

53

54 **INTRODUCTION**

55 *Stenotrophomonas maltophilia* is a Gram-negative obligate aerobe that is rod shaped and  
56 motile with a few polar flagella (1). In severely ill patients, *S. maltophilia* causes a wide range  
57 of infections such as bacteremia, pulmonary infections, urinary tract infections, wound  
58 infections, meningitis, peritonitis, ocular infections and endocarditis (2-4). The major  
59 predisposing factor for *S. maltophilia* infection in hospitalized patients is the implantation of

60 medical devices such as central venous catheters (5), urinary tract catheters (6), prosthetic  
61 heart valves (7), endotracheal tubes (8) and intraocular (9) and contact (10) lenses. Additional  
62 risk factors for *S. maltophilia* infections include immunosuppression, neutropenia, recent  
63 broad-spectrum antibiotic therapy, including carbapenems; and prolonged hospital stay (9). *S.*  
64 *maltophilia* is not a highly virulent pathogen, but it has emerged as an important nosocomial  
65 pathogen associated with crude mortality rates ranging from 14 to 69% in patients with  
66 bacteremia (11,12). Treatment of invasive infections caused by this organism is difficult as  
67 the bacterium is frequently resistant to a wide range of commonly used antimicrobials.  
68 Antibiotics with *in vitro* activity against *S. maltophilia* include trimethoprim-  
69 sulfamethoxazole (TMP-SMX), fluoroquinolones (FQs), tetracyclines, ticarcillin-clavulanate,  
70 and ceftazidime; however, there are limited clinical data focusing on *S. maltophilia* infections  
71 in children (5,13-17). TMP-SMX is recommended as the agent of primary choice for the  
72 treatment of *S. maltophilia* infections, but FQs are an attractive option due to *in vitro* activity  
73 (18). The purpose of this study was to evaluate patients with *S. maltophilia* infections and  
74 compare the treatment regimens of ciprofloxacin (CIP) monotherapy compared to TMP-  
75 SMX monotherapy.

76

## 77 MATERIAL AND METHODS

78 This retrospective study included patients with *S. maltophilia* bloodstream infections who had  
79 received monotherapy with TMP-SMX or CIP. The study population included patients with  
80 positive blood cultures for *S. maltophilia* who were younger than 18 years old. The  
81 bloodstream infections were diagnosed according to CDC (19). The patients who received  
82 treatment for *S. maltophilia* for at least 48 h were included in the study. Patients were  
83 excluded if they received combination therapy for *S. maltophilia*. All patients with positive  
84 blood cultures for *S. maltophilia* were identified from microbiological reports from January

85 2014 to February 2015. Identification and determination of antibiotic susceptibility were  
86 performed with the VITEK-2 system (BioMerieux, France). Antibiotic susceptibility testing  
87 was done as per Clinical and Laboratory Standards Institute (CLSI) guidelines. The dosage of  
88 CIP was 20-30 mg/kg/day in 2 divided doses (max dose: 1.5 g/day) and TMP-SMX was 20  
89 mg TMP/kg/day divided every 6 hours.

90 **Data.** Demographic information was collected from the patients' electronic medical records,  
91 including underlying illnesses, presence of indwelling devices, immunosuppression, and prior  
92 antibiotic use. Microbiological cure at the end of therapy (EOT), clinical response at EOT, in-  
93 hospital and 30-day mortality, and isolation of a nonsusceptible isolate within 30 days of EOT  
94 were recorded. The clinical response at EOT was evaluated and determined by improvement  
95 in all signs and symptoms of infection with no further treatment required. Microbiological  
96 cure was defined as a negative culture, from the same site as the original positive culture, at or  
97 prior to the EOT. Patients who did not have consecutive culture were excluded from analysis  
98 for this endpoint.

99 **Statistical analysis.** Categorical variables were analyzed using a chi-square or Fisher exact  
100 test. Continuous variables were analyzed using Student's *t* test or the Mann-Whitney U test. A  
101 *P* value of <0.05 denoted statistical significance. Data were analyzed using SPSS software  
102 version 20.0 (IBM Corp., Somers, NY).

103 The study was approved by local ethics committee of Dr. Behçet Uz Children's Hospital.

104

## 105 **RESULTS**

106 A total of 50 patients were included in this study with a median age of 3 months (ranging  
107 from 3 days to 17 years). Among them, 29 patients (58%) were female and 21 patients (42%)  
108 were male. Thirty-six (72%) patients were in the intensive care unit (ICU) including neonatal  
109 intensive care unit (22 [44%]), pediatric intensive care unit (9 [18%]), and cardiovascular

110 intensive care unit (5 [10%]) at the time of culture positivity. Other patients were in the  
111 pediatric infectious disease unit (11 [22%]), pediatric hematology-oncology department (2  
112 [4%]), and burn unit (1 [2%]). Twelve of 22 patients (54.5%) were premature infants  
113 hospitalized in the neonatal intensive care unit.

114 Forty patients (80%) had bloodstream infections and 10 patients (20%) had catheter-related  
115 bloodstream infections with *S. maltophilia*. Twenty-five patients (50%) received TMP-SMX,  
116 and 25 patients (50%) received CIP. The most common underlying co-morbid conditions  
117 were neurometabolic diseases (38%), leukemia (22%), cardiac diseases (8%), respiratory  
118 distress syndrome (6%), necrotizing enterocolitis (4%), and nephrotic syndrome (4%). The  
119 most common type of indwelling device was endotracheal tube (58%), followed by a central  
120 venous catheter (CVC) (30%) and genitourinary catheter (24%). Pulmonary infections  
121 accounted for 24% of all *S. maltophilia* infections. There were 4 (8%) pulmonary infections in  
122 patients who received TMP-SMX and 8 (16%) in patients who received CIP. Seventeen  
123 (34%) patients received an antibiotic prior to isolation of *S. maltophilia*. Cephalosporins  
124 (18%) and carbapenems (16%) were the most common used antibiotics (Table 1). No  
125 difference was present between TMP-SMX and CIP group by means of demographic features  
126 ( $p>0.05$ ) (Table 1).

127 The median duration of therapy was 11 days (IQR, 8 to 21 days) for patients who received  
128 CIP and 12 days (IQR, 3 to 21 days) for patients who received TMP-SMX ( $p = 0.784$ ) (Table  
129 1). Eleven patients (22%) had abnormalities in laboratory tests during treatment of CIP or  
130 TMP-SMX. Four patients had side-effects in CIP group (16%) while 7 patients (28%) had  
131 side-effects in TMP-SMX group, however no significant difference was present between  
132 these groups ( $p>0.05$ ). Thrombocytopenia was observed at 2 patients (4%) under CIP  
133 treatment and 3 patients (6%) under TMP-SMX. Hyponatremia developed in 1 patient (2%) at  
134 CIP group and 1 patient (2%) at TMP-SMX group. One patient at the CIP group had

135 hypokalemia who required treatment modification. Three patients (6%) under TMP-SMX  
136 treatment had elevated alanine aminotransferase (ALT) and aspartate aminotransferase (AST)  
137 levels (Table 2).  
138 None of the patients had died under CIP or TMP-SMX treatment following 7 days after  
139 treatment. There was no statistically significant difference between CIP and TMP-SMX  
140 groups by means of total number of side-effects ( $p>0.05$ ). Thirty days and in-hospital  
141 mortality between CIP and TMP-SMX groups were not significantly different ( $p>0.05$ )  
142 (Table-2). All patients except one who had side-effects due to the both of the drugs were  
143 hospitalized at the intensive care units including 5 premature patients in NICU, 3 patients in  
144 PICU and 2 patients in cardio-vascular ICU. Among the neonates treated with TMP-SMX;  
145 the ratio of side-effects was 30% (2 of 10 patients) and was 16.7% (2 of 12 patients) with CIP,  
146 although no significant difference was present ( $p>0.05$ ). The side-effect was present in 1 of 4  
147 patients in CIP group (25%) and 2 of 5 patients (40%) in TMP-SMX group in PICU. The rate  
148 of side-effects in patients hospitalized in other wards than ICU was very low and only one  
149 patient (1 of 8 patients treated with TMP-SMX) had side-effect with the treatment.

## 150 **DISCUSSION**

151 *S. maltophilia* is an opportunistic pathogen colonizing patients in intensive care settings,  
152 especially those with underlying debilitating conditions such as immunosuppression,  
153 malignancies, and implantation of foreign devices (catheters, respiratory therapy equipment,  
154 etc.) (3). In this study, 72% of patients were treated in the ICU. All of the patients had at least  
155 one indwelling devices and approximately 25% patients had immunosuppression.

156  
157 The treatment of *S. maltophilia* is problematic because of the common multidrug resistance  
158 (MDR) of the strains. The few available antibiotics that are naturally active against *S.*  
159 *maltophilia* include cotrimoxazole, some  $\beta$ -lactams (principally the combination ticarcillin-

160 clavulanic acid), and fluoroquinolones (essentially ciprofloxacin) (3). However the studies in  
161 children were limited.

162 Several studies have recommended the consideration of the use of TMP-SMX as the initial  
163 choice of the treatment of serious *S. maltophilia* infections (20,21). Fluoroquinolones, rapidly  
164 gaining prominence in treatment of *S. maltophilia*, are noted for their potency and tolerability.  
165 The previous studies showed that CIP could use alone or combination with TMP-SMX for  
166 treatment of *S. maltophilia* infections. Rojas et al. reported a case of *S. maltophilia* meningitis  
167 in a baby boy after a neurosurgical procedure, successfully treated with the combination of  
168 trimethoprim-sulfamethoxazole and ciprofloxacin (22). Lo et al. reported a preterm infant  
169 with multi-resistant *S. maltophilia* (including resistance to TMP-SMX) meningitis  
170 successfully treated with ciprofloxacin (23). Wang et al. had evaluated 98 adult patients with  
171 *S. maltophilia* infections and assessed the effectiveness of treatment with FQ monotherapy  
172 compared to TMP-SMX monotherapy (24). The outcome that patients receiving CIP showed  
173 clinical outcomes similar to those receiving TMP-SMX for the treatment of *S. maltophilia*  
174 bacteremia.

175 *Stenotrophomonas maltophilia* infections are associated with high morbidity and mortality,  
176 with estimated crude mortality rates ranging from 20 to 70% and with the risk of mortality  
177 highest among patients receiving inappropriate initial antimicrobial therapy (5,9,13,15,25). In  
178 our study, the 30-days mortality rate and in-hospital case fatality rate were 4% and 8%  
179 respectively. The mortality associated with *S. maltophilia* infections had been reported with a  
180 wide range between 14 to 62% (6-13,17). The variability of the mortality rates could be due  
181 to the variability of the patients and type of infections (24). Wang et al. had identified in-  
182 hospital mortality rate of 24% for all patients with *S. maltophilia* infections treated with TMP-  
183 SMX or FQ monotherapy (24). However the study group included geriatric patients with a  
184 mean age of 73 years. One report had reported all-cause mortality as low as 14 % and

185 infection-related mortality rate of only 4% (15). The authors in the latter article suggested that  
186 high rates of patient ratio in other wards instead of ICU patients might be a factor for  
187 relatively low mortality in that study (15). However all these studies were adult studies and  
188 limited information for mortality rates in children following *S. maltophilia* infections was  
189 present with different rates. While an one study from Turkey, mortality was reported 2 of 33  
190 (6%) in children with *S. maltophilia* infections (26); another study from Taiwan had reported  
191 the crude mortality as high as 40.6% (27). Our study had low mortality rated as 4% despite  
192 72% of the patients were ICU patients showing the variability of mortality rates. The rate of  
193 mortality was not different between CIP and TMP-SMX group, supporting the previous  
194 studies in adult patients.

195 In our study; side-effects ratio were not statistically different between CIP and TMP-SMX  
196 group, however elevated liver enzymes were more prominent in the TMP-SMX group. TMP-  
197 SMX is worth mentioning especially in neonates, since previous clinical studies had  
198 demonstrated occurrence of kernicterus with a sulfonamide “sulfisoxazole”, however a review  
199 of the literature showed no incidence of kernicterus in neonates (28) as in our study. However  
200 other side-effects were prominent in especially premature infants although no significant  
201 difference was present compared to CIP. Beyond the neonatal group, both drugs appeared to  
202 be good choice for *S. maltophilia* infections.

203 The general use of FQs in pediatric patients are restricted depending on the preclinical studies  
204 of quinolones in juvenile beagle dogs in which articular cartilage damage in weight-bearing  
205 joints(29-31) were observed and emerging concern for the occurrence of similar adverse  
206 effects in growing children. In a prospective multicenter, observational, cohort study  
207 comparing adverse events in 276 pediatric patients who had treated with FQ, adverse  
208 musculoskeletal events were reported to be more frequent comparing to the control group  
209 however no severe or persistent musculoskeletal injuries were observed at follow-up in this



210 study (32). In a systematic review of ciprofloxacin safety in 16,184 children from 105 studies,  
211 258 musculoskeletal adverse events was observed in 232 pediatric patients (estimated risk,  
212 1.6; 95% CI, 0.9 to 2.6), approximately 1 musculoskeletal adverse event for every 62.5  
213 patients. Arthralgia was the most common reported adverse musculoskeletal event (50%),  
214 affecting mostly the knee joint (33). Furthermore data from pooled safety studies; revealed  
215 was a 57% increased risk of arthropathy in the patients receiving ciprofloxacin compared to  
216 that in patients in the control arm (25). However, in another review of the literature analysis  
217 of the short-term and long-term effects of ciprofloxacin on cartilage and growth indicated no  
218 significant differences between ciprofloxacin and control groups (34). Despite many previous  
219 studies showing no significant increase in musculoskeletal complications in these children,  
220 there are still concerns about potential musculoskeletal adverse effects in young children  
221 treated with FQs.

222 The present study has several limitations. Firstly, treatment groups were assigned  
223 retrospectively and were not randomized. Secondly, in our study *S. maltophilia* strains were  
224 susceptible to only TMP-SMX and CIP; so we found the mortality rate lower than other  
225 studies. Therefore, our results could not be generalized for multidrug-resistant *S. maltophilia*  
226 strains. In the previous studies, major limitation reported was failure to to distinguish between  
227 colonization and infection with *S. maltophilia* may also influence clinical success (15).  
228 However we could overcome this limitation by including only patients with documented  
229 bacteremia with *S. maltophilia*.

230

## 231 **CONCLUSION**

232 CIP had the same clinical outcome and mortality as TMP-SMX for the treatment of *S.*  
233 *maltophilia* bacteremia. Our data suggest that either CIP or TMP-SMX would be appropriate  
234 choice in for isolates known to be susceptible. Due to the feared arthrotoxicity associated with

235 FQ, CIP should be considered in cases in which TMP-SMX could not be used or stopped due  
236 to the side-effects. Further prospective randomized studies are required for comparing CIP  
237 and TMP-SMX for the treatment of *S. maltophilia* infections in pediatric patients including  
238 neonates.

239

#### 240 **Acknowledgement**

241 The Authors declare that there is no conflict of interests.

#### 242 **Funding Information**

243 No funding was received for this manuscript.

#### 244 **Author Contributions**

245 **Ahu Aksay:** Concept, Design, Data Collection and/or Processing, Literature review, Writing.

246 **İlker Devrim:** Concept, Design, Analysis and/or Interpretation, Supervision, Literature  
247 review, Writing, Critical Review.

248 **Nuri Bayram:** Analysis and/or Interpretation, Supervision, Critical Review, Literature  
249 review.

250 **Nagehan Katipoglu:** Literature review.

251 **Gökhan Ceylan:** Literature review.

252 **Şebnem Çalkavur:** Literature review, Supervision.

253 **Sertaç Arslanoglu:** Literature review, Supervision.

254 **Hasan Agın:** Analysis and/or Interpretation, Supervision, Critical Review.

255 **Gamze Gulfidan:** Data Collection and/or Processing, Literature review, Writing.

256

#### 257 **Conflict of interest**

258 None

259

260 **REFERENCES**

- 261 1. Carmody LA, Spilker T, LiPuma JJ. 2011. Reassessment of *Stenotrophomonas maltophilia*  
262 phenotype. *J Clin Microbiol* 49:1101–1103.
- 263 2. Koseoglu O, Sener B, Gulmez D, et al. 2004. *Stenotrophomonas maltophilia* as a  
264 nosocomial pathogen. *New Microbiol* 27:273-279.
- 265 3. Denton M, Kerr KG. 1998. Microbiological and clinical aspects of infection associated  
266 with *Stenotrophomonas maltophilia*. *Clin Microbiol Rev* 11:57-80.
- 267 4. Micozzi A, Venditti M, Monaco M, et al. 2000. Bacteremia due to *Stenotrophomonas*  
268 *maltophilia* in patients with hematological malignancies. *Clin Infect Dis* 31:705-711.
- 269 5. Muder RR, Harris AP, Muller S, et al. 1996. Bacteremia due to *Stenotrophomonas*  
270 (*Xanthomonas*) *maltophilia*: a prospective multi-center study of 91 episodes. *Clin Infect Dis*  
271 22:508–512.
- 272 6. Khardori N, Elting L, Wong E, et al. 1991. Nosocomial infections due to *Xanthomonas*  
273 *maltophilia* (*Pseudomonas maltophilia*) in patients with cancer. *Rev Infect Dis* 12:997–1003.
- 274 7. Khan IA, Mehta NJ. 2002. *Stenotrophomonas maltophilia* endocarditis: a systematic  
275 review. *Angiology* 53:49–55.
- 276 8. Metan G, Hayran M, Hascelik G, et al. 2006. Which patient is a candidate for empirical  
277 therapy against *Stenotrophomonas maltophilia* bacteraemia? An analysis of associated risk  
278 factors in a tertiary care hospital. *Scand. J Infect Dis* 38:527–531.

- 279 9. Horio N, Horiguchi M, Murakami K, et al. 2000. *Stenotrophomonas maltophilia*  
280 endophthalmitis after intraocular lens implantation. *Graefe's Arch Clin Exp Ophthalmol*  
281 238:299–301.
- 282 10. Cowell BA, Willcox MD, Schneider RP. 1998. A relatively small change in sodium  
283 chloride concentration has a strong effect on adhesion of ocular bacteria to contact lenses. *J*  
284 *Appl Microbiol* 84:950–958.
- 285 11. Jang TN, Wang FD, Wang LS, et al. 1992. *Xanthomonas maltophilia* bacteremia: an  
286 analysis of 32 cases. *J Formos Med Assoc* 91:1170–1176.
- 287 12. Victor MA, Arpi M, Bruun B, et al. 1994. *Xanthomonas maltophilia* bacteremia in  
288 immunocompromised hematological patients. *Scand J Infect Dis* 26:163–170.
- 289 13. Falagas ME, Valkimadi PE, Huang YT, et al. 2008. Therapeutic options for  
290 *Stenotrophomonas maltophilia* infections beyond co-trimoxazole: a systematic review. *J*  
291 *Antimicrob Chemother* 62:889–894.
- 292 14. Czosnowski QA, Wood GC, Magnotti LJ, et al. 2011. Clinical and microbiologic  
293 outcomes in trauma patients treated for *Stenotrophomonas maltophilia* ventilator-associated  
294 pneumonia. *Pharmacotherapy* 31:338–345.
- 295 15. Samonis G, Karageorgopoulos DE, Maraki S, et al. 2012. *Stenotrophomonas maltophilia*  
296 infections in a general hospital: patient characteristics, antimicrobial susceptibility, and  
297 treatment outcome. *PLoS One* 7(5):e37375.
- 298 16. Wang WS, Liu CP, Lee CM, et al. 2004. *Stenotrophomonas maltophilia* bacteremia in  
299 adults: four years' experience in a medical center in northern Taiwan. *J Microbiol Immunol*  
300 *Infect* 37:359–365.

- 301 17. Belvisi V, Fabietti P, Del Borgo C, et al. 2009. Successful treatment of *Stenotrophomonas*  
302 *maltophilia* soft tissue infection with tigecycline: a case report. *J Chemother* 21:367–368.
- 303 18. Weiss K, Restieri C, De Carolis E, et al. 2000. Comparative activity of new quinolones  
304 against 326 clinical isolates of *Stenotrophomonas maltophilia*. *J Antimicrob Chemother*  
305 45:363–365.
- 306 19. Horan TC, Andrus M, Dudeck MA. 2008. CDC/NHSN surveillance definition of health  
307 care-associated infection and criteria for specific types of infections in the acute care setting.  
308 *Am J Infect Control* 36:309–332.
- 309 20. Smit WJ, Boquest AL, Geddes JE, et al. 1994. The antibiotic susceptibilities of  
310 *Xanthomonas maltophilia* and their relation to clinical management. *Pathology* 26:321-324.
- 311 21. Vartivarian S, Anaissie E, Bodey G, et al. 1994. A changing pattern of susceptibility of  
312 *Xanthomonas maltophilia*; implications for therapy. *Antimicrob Agents Chemother* 38:624-  
313 627.
- 314 22. Rojas P, Garcia E, Calderón GM, et al. 2009. Successful treatment of *Stenotrophomonas*  
315 *maltophilia* meningitis in a preterm baby boy: a case report. *J Med Case Rep* 3(1), 7389.
- 316 23. Lo WT, Wang CC, Lee CM, et al. 2002. Successful treatment of multi-resistant  
317 *Stenotrophomonas maltophilia* meningitis with ciprofloxacin in a pre-term infant. *Eur J*  
318 *Pediatr* 161:680-1682.
- 319 24. Wang YL, Scipione MR, Dubrovskaya Y, et al. 2013. Monotherapy with Trimethoprim-  
320 Sulfamethoxazole for Treatment of *Stenotrophomonas maltophilia* Infections. *Antimicrob*  
321 *Agents Chemother* 58:176–182.

- 322 25. Tsiodras S, Pittet D, Carmeli Y, et al. 2000. Clinical implications of *Stenotrophomonas*  
323 *maltophilia* resistant to trimethoprim-sulfamethoxazole: a study of 69 patients at 2 university  
324 hospitals. *Scand J Infect Dis* 32:651–656.
- 325 26. Güriz H, Ciftçi E, Ayberkin E, et al. 2008. *Stenotrophomonas maltophilia* bacteraemia in  
326 Turkish children. *Ann Trop Paediatr* 28:129-136.
- 327 27. Wu PS, Lu CY, Chang LY, et al. 2006. *Stenotrophomonas maltophilia* bacteremia in  
328 pediatric patients-- a 10-year analysis. *J Microbiol Immunol Infect* 39:144-149.
- 329 28. Thyagarajan B, Deshpande SS. 2014. Cotrimoxazole and neonatal kernicterus: a review.  
330 *Drug Chem Toxicol* 37:121–129.
- 331 29. Melhus A. 2005. Fluoroquinolones and tendon disorders. *Expert Opin Drug Saf* 4:299-  
332 309.
- 333 30. Forsythe CT, Ernst ME. 2007. Do fluoroquinolones commonly cause arthropathy in  
334 children? *CJEM* 9:459-462.
- 335 31. Sansone JM, Wilsman NJ, Leiferman EM, et al. 2009. The effect of fluoroquinolone  
336 antibiotics on growing cartilage in the lamb model. *J Pediatr Orthop* 29:189-195.
- 337 32. Chalumeau M, Tonnelier S, D'Athis P, et al. 2003. Fluoroquinolone safety in pediatric  
338 patients: a prospective, multicenter, comparative cohort study in France. *Pediatrics* 111:114-  
339 119.
- 340 33. Adefurin A, Sammons H, Jacqz-Aigrain E, et al. 2011. Ciprofloxacin safety in paediatrics:  
341 a systematic review. *Arch Dis Child* 96:874-880.
- 342 34. Kaguelidou F, Turner MA, Choonara I, et al. 2011. Ciprofloxacin use in neonates: a  
343 systematic review of the literature. *Pediatr Infect Dis J* 30:29-37.
- 344
- 345
- 346

**Table-1:** Comparison of demographic characteristics of patients with *S. maltophilia* infection who received monotherapy with trimethoprim-sulfamethoxazole or ciprofloxacin

| Patient characteristics       | Value*            |               |                               | P value |
|-------------------------------|-------------------|---------------|-------------------------------|---------|
|                               | TMP-SMX<br>(n=25) | CIP<br>(n=25) | Overall<br>(n=50)             |         |
| <b>Female gender</b>          | 17                | 11            | 29                            | >0.05   |
| <b>Male gender</b>            | 8                 | 14            | 21                            |         |
| <b>Age (median)</b>           | 5 months          | 3 months      | 3 months<br>(3 days-17 years) | >0.05   |
| <b>Underlying illness</b>     |                   |               |                               |         |
| Neurometabolic diseases       | 11 (22)           | 8 (16)        | 19 (38)                       |         |
| Leukemia                      | 5 (10)            | 6 (12)        | 11 (22)                       |         |
| Cardiac diseases              | 2 (4)             | 2 (4)         | 4 (8)                         | >0.05   |
| Respiratory distress syndrome | 1 (2)             | 2 (4)         | 3 (6)                         |         |
| Necrotizing enterokolitis     | 1 (2)             | 1 (2)         | 2 (4)                         |         |
| Nephrotic syndrome            | 1 (2)             | 1 (2)         | 2 (4)                         |         |
| No underlying disease         | 5 (10)            | 5 (10)        | 8 (20)                        |         |
| <b>Immunosuppression</b>      | 6 (12)            | 6 (12)        | 12 (24)                       | >0.05   |
| <b>Indwelling devices</b>     |                   |               |                               |         |
| Mechanical ventilation        | 15 (30)           | 14 (28)       | 29 (58)                       |         |
| Genitourinary catheter        | 7 (14)            | 8 (16)        | 15 (30)                       | >0.05   |
| Central venous catheter       | 6 (12)            | 6 (12)        | 12 (24)                       |         |
| <b>Prior antibiotic use</b>   |                   |               |                               |         |
| Carbapenems                   | 3 (6)             | 5 (10)        | 8 (16)                        | >0.05   |
| Cephalosporins                | 5(10)             | 4 (8)         | 9 (18)                        |         |
| <b>Site of infection</b>      |                   |               |                               |         |
| Bacteremia                    | 21 (42)           | 16 (32)       | 37 (74)                       | >0.05   |
| Pulmonary                     | 4 (8)             | 8 (16)        | 12 (24)                       |         |
| Urinary tract                 | -                 | 1 (2)         | 1 (2)                         |         |

<sup>a</sup>All values shown as number (percent), unless otherwise specified.

TMP-SMX: Trimethoprim-sulfamethoxazole

CIP: Ciprofloxacin

**Table-2:** Comparison of side-effects of trimethoprim-sulfamethoxazole or ciprofloxacin monotherapy in children

|                                              | <b>TMP-SMX*</b> | <b>CIP*</b> | <b>Overall*</b> |
|----------------------------------------------|-----------------|-------------|-----------------|
| <b>Daystotreatment (days) [median (IQR)]</b> | 12              | 11          | 11.5            |
| <b>Abnormalities in laboratory tests</b>     |                 |             |                 |
| Thrombocytopenia                             | 3 (6)           | 2 (4)       | 5 (10)          |
| Hyponatremia                                 | 1 (2)           | 1 (2)       | 2 (4)           |
| Hypokalemia                                  | -               | 1 (2)       | 1 (2)           |
| Elevated liver enzymes                       | 3 (6)           | -           | 3 (6)           |
| <b>30-days case fatality rate</b>            | 1 (2)           | 1 (2)       | 2 (4)           |
| <b>In-hospital case fatality rate</b>        | 3 (6)           | 1 (2)       | 4 (8)           |

\*All values shown as number (percent), unless otherwise specified.

TMP-SMX: Trimethoprim-sulfamethoxazole

CIP: Ciprofloxacin
